# Supplementary material
Source: publisher site journal article supplement (https://www.spandidos-publications.com/5202/downloadSupplementary)

Figure S1. Effects of C646 treatment on histone H3 acetylation by western blotting. C646 was incubated with cells for 72 h. Increased histone acetylation in GEM-R cells was attenuated by C646. The downregulation of H3K9 and H3K27 acetylation was confirmed when compared with DMSO vehicle treatment (H3K9Ac: 0.48-fold decrease; H3K27Ac: 0.39-fold decrease; \* $P < 0.05$  vs. controls by t-test). Error bars represent the mean  $\pm$  SD. Each assay was performed in duplicate. GEM-R, gemcitabine-resistant.

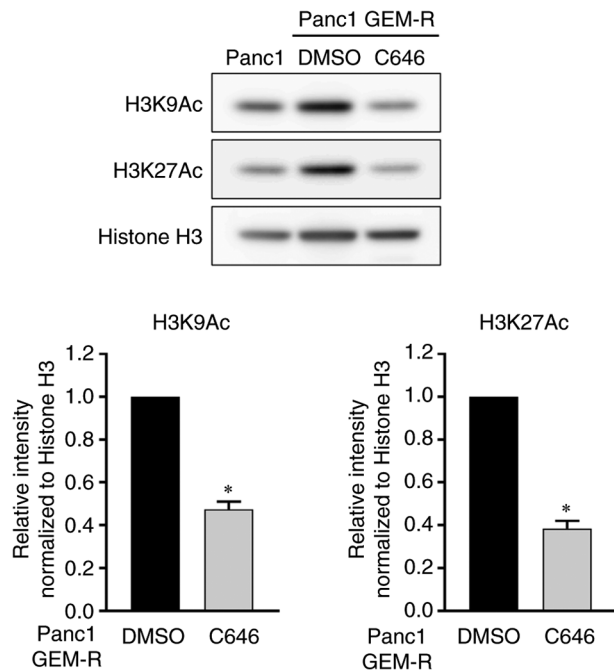

Figure S2. Effects of RRM1 gene silencing on N-cadherin expression. Cells were treated with RRM1-specific siRNAs or negative control-siRNA for 72 h. RRM1 suppression markedly reduced N-cadherin expression. RRM1, ribonucleotide reductase large subunit M1; siRNA, small interfering RNA; NC negative control.

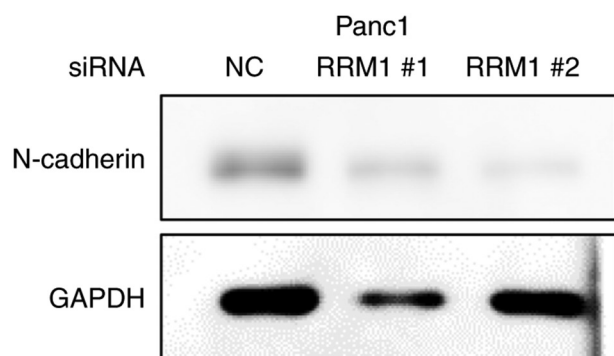

Supplement: Supplementary file 1 [file downloadSupplementary]
